# Supplementary material
Source: HighWire-hosted journal article supplement (https://bmjopen.bmj.com/content/10/1/e034404)
Supplement: inline-supplementary-material-2 [file inline-supplementary-material-2.pdf]

**Appendix 2: Functional Movement Testing – Tablet Protocol**

Press home

Type in code \_ \_ \_ \_

Go to safari (compass icon)

Search 'Google'

Search 'Oxford weather forecast'

Select BBC weather

Scroll across hourly forecast and select 'see more weather for \_\_\_\_\_'

Scroll across again

Scroll down the page and select and play the BBC South Today weather video.

Press the full screen button in the right bottom corner of the screen. Watch the video then minimise the screen.

Go to the internet search bar and search 'google'

Search 'Amazon'

Select the Amazon website

Search 'Bicycle' and scroll to select a bicycle you like

Add to basket, then navigate back to the search page

Search 'Bicycle Helmet' and again scroll and select one.

Press the back button in the top left corner until back to the safari/google page

Type following sums:

$100 \times 70 / 45 =$

$80 + 6 + 95 + 43 + 51 + 15 =$
